# Supplementary material for: Magnetic Properties of Nitrogen-Doped Graphene Induced by Dopant Configurations
Source: MDPI journal article supplement (doi:10.3390/nano15221694), 2025-11-09
Supplement: s1 [file nanomaterials-3936704-supplementary.pdf › nanomaterials-3936704-supplementary.pdf]

## Supplementary Materials

### Magnetic Properties in Nitrogen-Doped Graphene Governed by Dopant Configurations

Madhuparna Chakraborty<sup>1\*</sup>, Gregory Jenson<sup>2</sup>, David C. Ingram<sup>2</sup>, Eric Stinaff<sup>2</sup>, and Wojciech M. Jadwisieniczak<sup>1</sup>

<sup>1</sup>School of Electrical Engineering and Computer Science, Ohio University, Athens, OH 45701, USA

<sup>2</sup>Department of Physics and Astronomy, Ohio University, Athens, OH 45701, USA

\*[mc559517@ohio.edu](mailto:mc559517@ohio.edu)

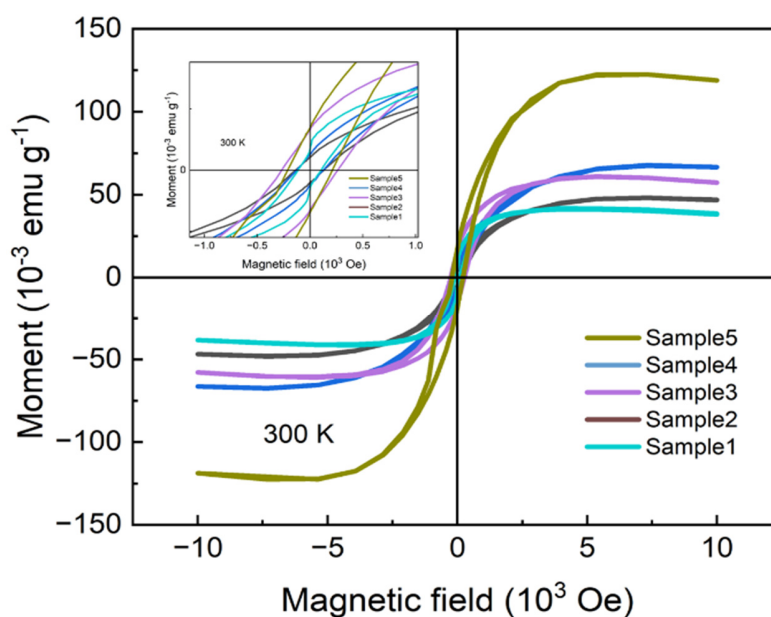

**Figure S1.** M-H curves measured for different NG samples with synthesis parameters shown in Table S1.

Figure S1 shows room temperature magnetization M-H curves of annealed NG-500 and NG-600 samples, along with S2 samples, which was discussed in the main text because of the enhanced magnetization. The annealing of NG-500 and NG-600 resulted in deterioration of magnetic saturation compared to the S2 sample.

**Table S1.** Parameters used for the optimization of NG materials during the two-step synthesis.

| Sample          | Input parameters           |                            | Output parameters                               |                 |                                  |
|-----------------|----------------------------|----------------------------|-------------------------------------------------|-----------------|----------------------------------|
|                 | Synthesis temperature (°C) | Annealing temperature (°C) | Saturation magnetization (emu g <sup>-1</sup> ) | Coercivity (Oe) | Remanance (emu g <sup>-1</sup> ) |
| Sample 0 / (S1) | 400                        | -                          | 0.003                                           | 40              | 0.0002                           |
| Sample 1        | 500                        | 700                        | 0.039                                           | 134.48          | 0.0060                           |
| Sample 2        | 500                        | 650                        | 0.048                                           | 110.44          | 0.0050                           |
| Sample 3        | 600                        | 800                        | 0.057                                           | 269.75          | 0.0080                           |
| Sample 4        | 600                        | 700                        | 0.068                                           | 125.32          | 0.0060                           |
| Sample 5 / (S2) | 400                        | 600                        | 0.130                                           | 235.87          | 0.0100                           |

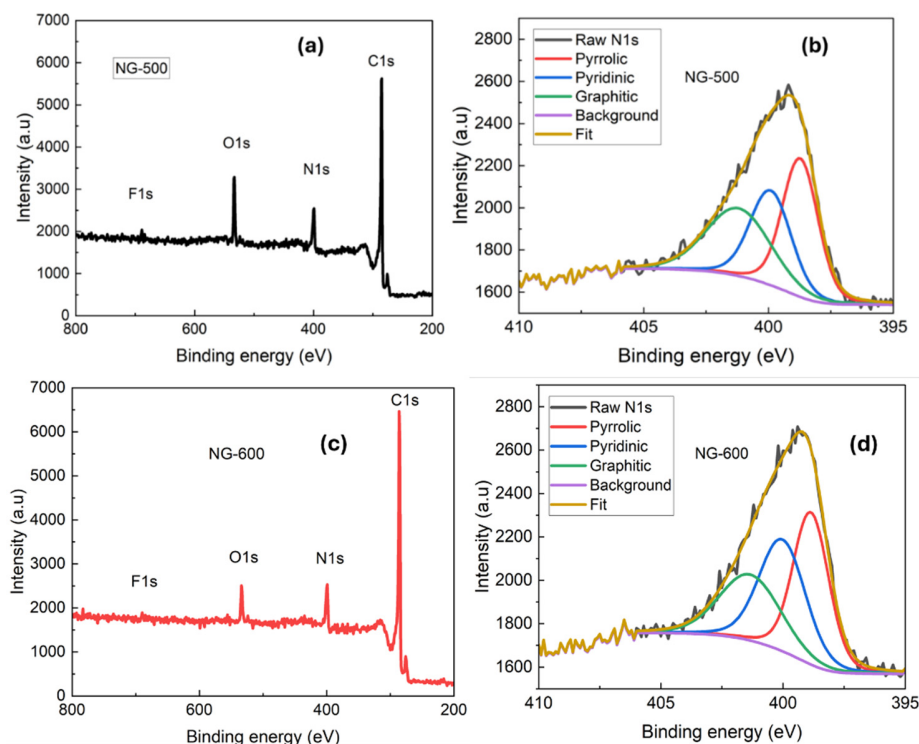

**Figure S2.** (a) Survey spectrum of NG-500 (b) High resolution of N1s spectra of NG-500 (c) Survey spectrum of NG-600 (d) High resolution of N1s spectra for NG-600

NG-500 and NG-600 refer to samples that did not undergo annealing. The survey spectra in Figure S2(a) and (c) show a decrease in nitrogen, oxygen, and fluorine content with increasing reaction temperature from 500 °C to 600 °C. The N 1s spectra in Figure S2(b) and (d) further indicate that pyrrolic-N is the dominant configuration in both samples.

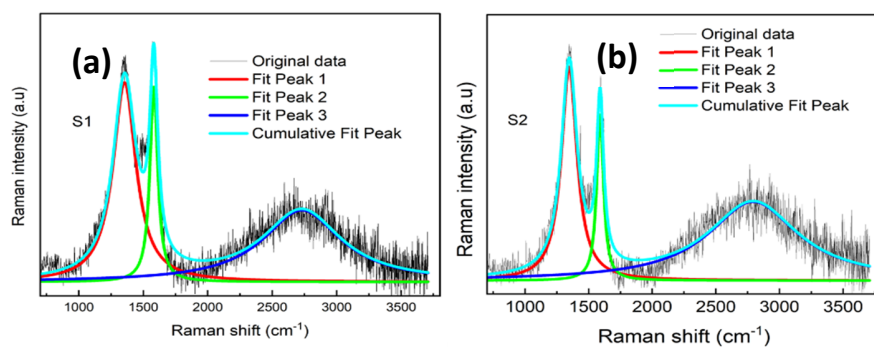

**Figure S3.** The deconvoluted Raman spectra for (a) S1, (b) S2

To determine the  $I_D/I_G$  ratio, the Raman spectra of S1 and S2 were fitted using three Lorentzian peaks centered at  $\sim 1352$   $\text{cm}^{-1}$  (D band),  $\sim 1589$   $\text{cm}^{-1}$  (G band), and  $\sim 2749$   $\text{cm}^{-1}$  (2D band). The corresponding fitted spectra are shown in Figure S3(a) and (b). The quality of the fits was high, with adjusted  $R^2$  values of  $\sim 0.97$  or greater.
